# Supplementary material for: Epidemiology and Treatment of Distal Radius Fractures in Finland—A Nationwide Register Study
Source: MDPI journal article supplement (doi:10.3390/jcm11102851), 2022-05-18
Supplement: s1 [file s1]

**Table S1.** Types of surgical procedures for distal radius fracture according to NOMESCO classification.

|        |                                                                                  |
|--------|----------------------------------------------------------------------------------|
| NCJ 62 | Internal fixation of fracture of forearm using plate                             |
| NCJ64  | Other internal fixation of fracture of forearm (screw, pin)                      |
| NCJ70  | External fixation of fracture of elbow or forearm, body of ulna and radius       |
| NDJ62  | Internal fixation of fracture of wrist or hand using plate and screws, schaphoid |
| NDJ64  | Internal fixation of fracture of wrist or hand wire, rod, cerclage, or pin       |
| NDJ70  | Internal fixation of fracture of wrist or hand wire, rod, cerclage, or pin       |

**Table S2.** Annual incidence of distal radius fractures (DRF), specialist and primary care (with 95% confidence intervals).

|                          | 2015                   | 2016                   | 2017                     | 2018                   | 2019                   |
|--------------------------|------------------------|------------------------|--------------------------|------------------------|------------------------|
| Specialist care (95% CI) | 204,38 (200,59-208,15) | 196,30 (192,60-200,00) | 206,7,00 (203,21-210,80) | 201,83 (198,10-205,57) | 215,20 (211,34-219,06) |
| Primary care (95% CI)    | 85,83 (83,38-88,28)    | 71,57 (69,34-73,81)    | 75,46 (73,17-77,75)      | 67,80 (65,63-69,97)    | 47,74 (45,91-49,56)    |

**Table S3.** Incidence of DRF men and women in different age groups and years.

|       | 2015   |        | 2016   |        | 2017   |        | 2018   |        | 2019   |        |
|-------|--------|--------|--------|--------|--------|--------|--------|--------|--------|--------|
| Age   | Men    | Women  |
| 0-9   | 269,17 | 261,47 | 256,11 | 253,53 | 264,29 | 234,91 | 261,3  | 243,58 | 295,61 | 277,06 |
| 10-19 | 389,66 | 186,95 | 400,9  | 183,45 | 358,95 | 186,65 | 416,46 | 196,32 | 419,76 | 203,01 |
| 20-29 | 72,51  | 68,2   | 80,21  | 84,2   | 78,52  | 93,72  | 78,93  | 92,95  | 84,4   | 98,81  |
| 30-39 | 82,65  | 92,37  | 74,53  | 94,75  | 65,11  | 105,5  | 73,59  | 103,22 | 74,61  | 96,13  |
| 40-49 | 96,44  | 134,7  | 79,99  | 133,84 | 95,8   | 161,98 | 93,65  | 143,97 | 99,73  | 147,09 |
| 50-59 | 111,71 | 324,18 | 96,04  | 301,15 | 100,51 | 354,06 | 95,23  | 305,46 | 109,12 | 328,39 |
| 60-69 | 99,54  | 443,52 | 101,14 | 428,75 | 106,07 | 493,77 | 100,47 | 434,34 | 119,4  | 459,05 |
| 70-79 | 102,86 | 474,1  | 84,53  | 447,82 | 94,89  | 483,21 | 83,99  | 453,18 | 102,1  | 506,9  |
| 80-   | 116,12 | 512,47 | 124,8  | 470,37 | 132,18 | 470,98 | 124,01 | 518,35 | 103,8  | 543,35 |

**Table S4.** Annual incidence rate due to distal radius fracture (DRF) operative treatment in men and women.

|      | Men                 | Women               |
|------|---------------------|---------------------|
| 2015 | 30,02 (27,96-32,09) | 53,99 (51,26-56,72) |
| 2016 | 30,72 (28,63-32,80) | 55,07 (52,32-57,52) |
| 2017 | 30,19 (28,13-32,26) | 62,40 (59,48-65,33) |
| 2018 | 31,69 (29,58-33,80) | 61,44 (58,54-64,35) |
| 2019 | 33,07 (30,91-35,23) | 60,38 (57,50-63,26) |

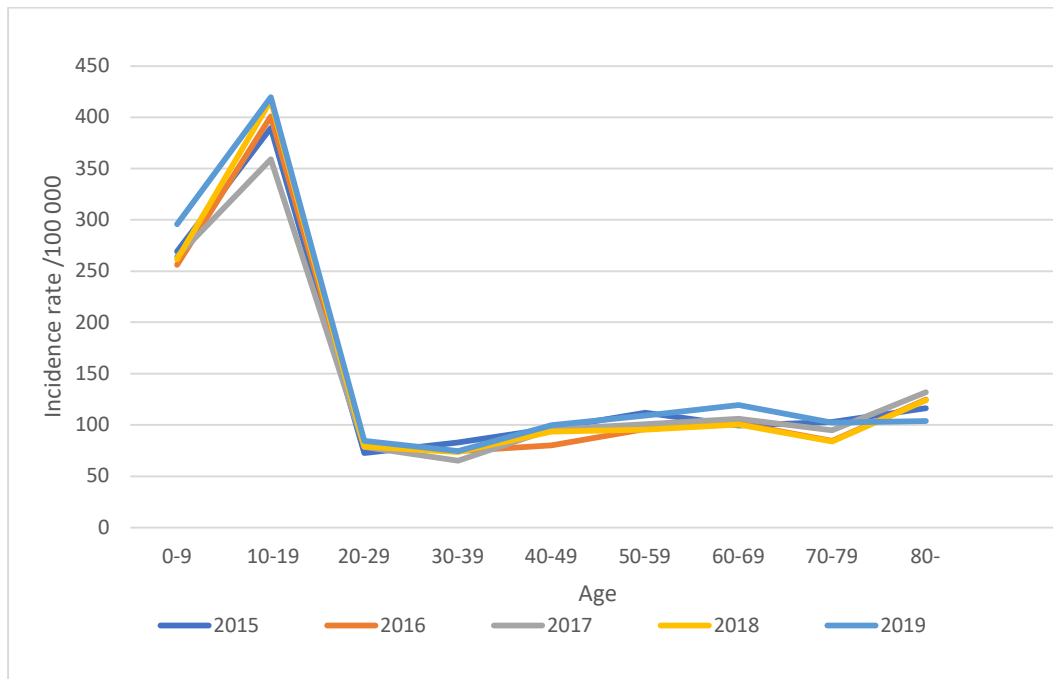

**Figure S1.** Annual incidence rate/100 000 in distal radius fractures in men different age groups years 2015-2019.

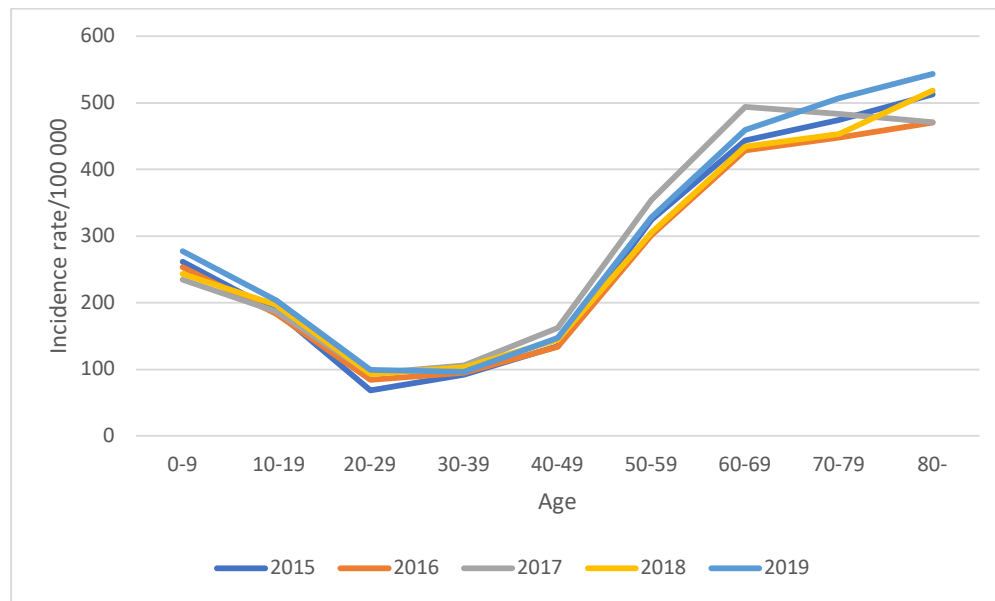

**Figure S2.** Annual incidence rate in distal radius fractures/100 000 in women in different age groups years 2015-2019.
